# Supplementary material for: Natural product Swietenine improve the progression of diabetic nephropathy by inhibiting ferroptosis through activation of the Akt/GSK-3β/Nrf2 signaling pathway
Source: Research Square preprint supplement (doi:10.21203/rs.3.rs-4375599/v1), 2024-05-14
Supplement: Supplementary file 1 [file fd7240699448158a4ac75138.docx]

**Natural product Swietenine improve the progression of diabetic nephropathy by inhibiting ferroptosis through activation of the Akt/GSK‑3β/Nrf2 signaling pathway**

Mengyuan Lua1, Jingyu Duana1, Shuang Liua1, Wenhao Denga, Feilong Peia, Yaowu Liub*, Chunping Zhanga**


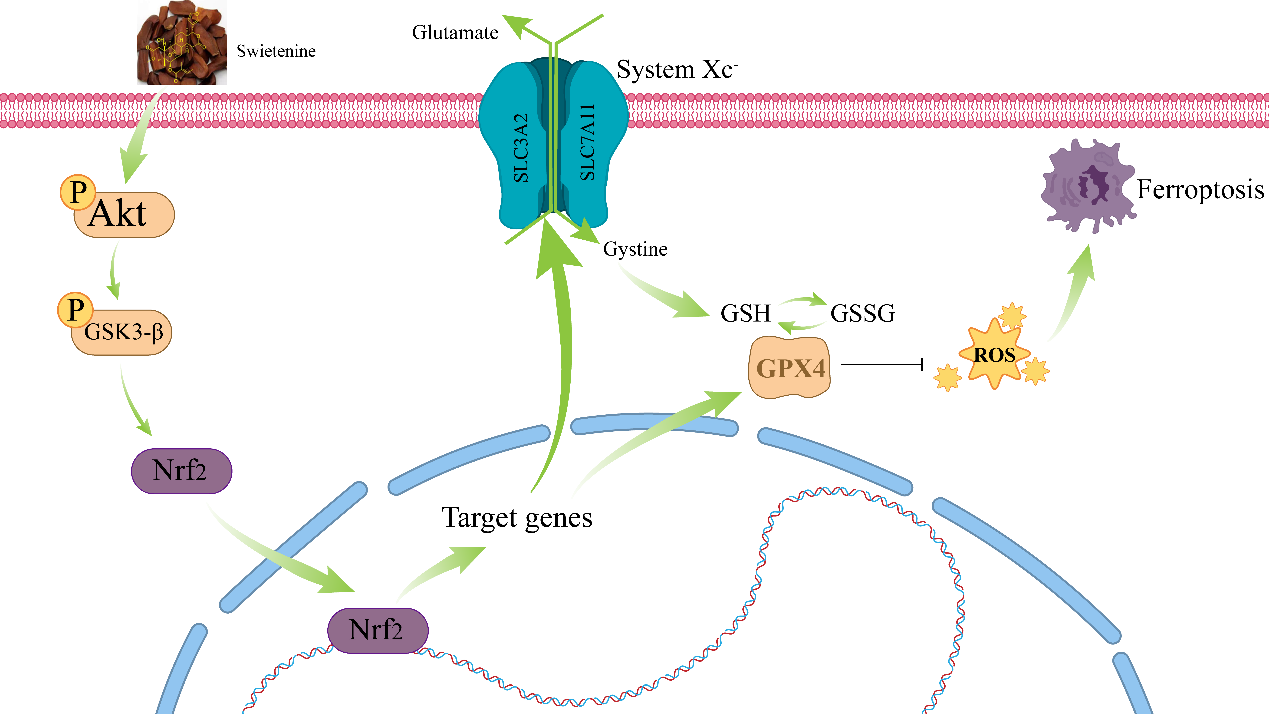


Schematic diagram of the model for the effect of Swi on ferroptosis. Swi inhibits ferroptosis by activating Akt/GSK-3β/Nrf2 pathway and alleviates DN mechanism diagram.
